# Supplementary material for: Endogenous IgG-based affinity-controlled release of TRAIL exerts superior antitumor effects
Source: PubMed Central journal article supplement — Theranostics. 2018 Mar 28;8(9):2459–76. doi: 10.7150/thno.23880 (PMC5928902; doi:10.7150/thno.23880), 2018-03-28
Supplement: thnov08p2459s1.pdf [file thnov08p2459s1.pdf]

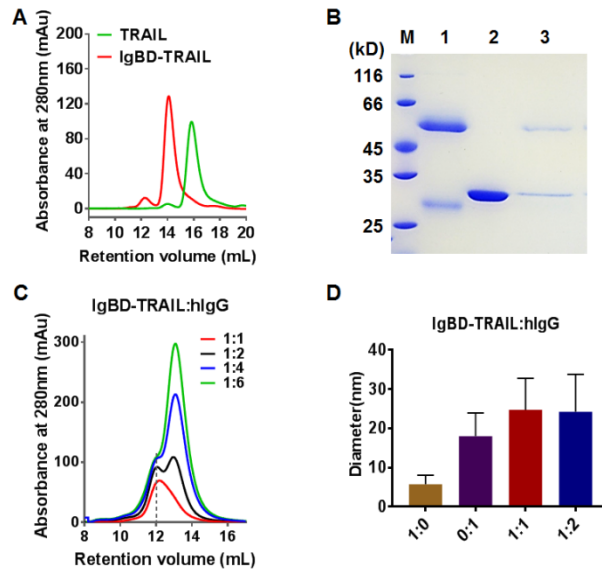

**Figure S1** (A) SEC of purified IgBD-TRAIL and TRAIL. (B) Identification of protein components in the novel protein peak (Lane 3) visualized by SEC in IgBD-TRAIL and hIgG mixture. Unmixed hIgG (Lane 1) and IgBD-TRAIL (Lane 2) were used as control. M: protein markers. (C) SEC of the IgBD-TRAIL preincubated with hIgG at different molar ratios. (D) Dynamic light scattering of hIgG and IgBD-TRAIL preincubated with different amount of hIgG.

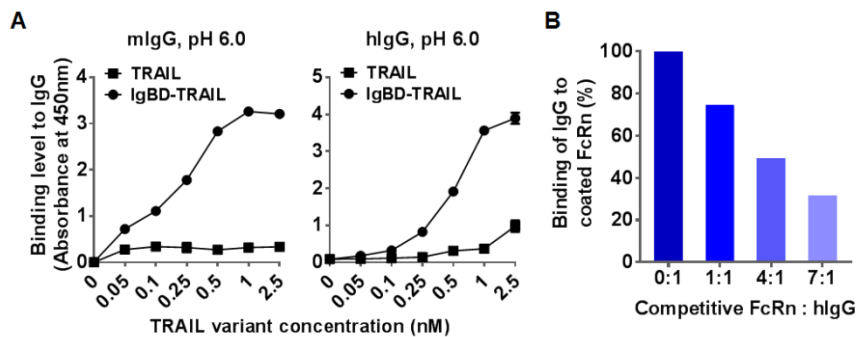

**Figure S2** (A) ELISA for mIgG and hIgG binding of IgBD-TRAIL at pH 6.0. (B) Inhibition of FcRn binding of hIgG by addition of exogenous FcRn.

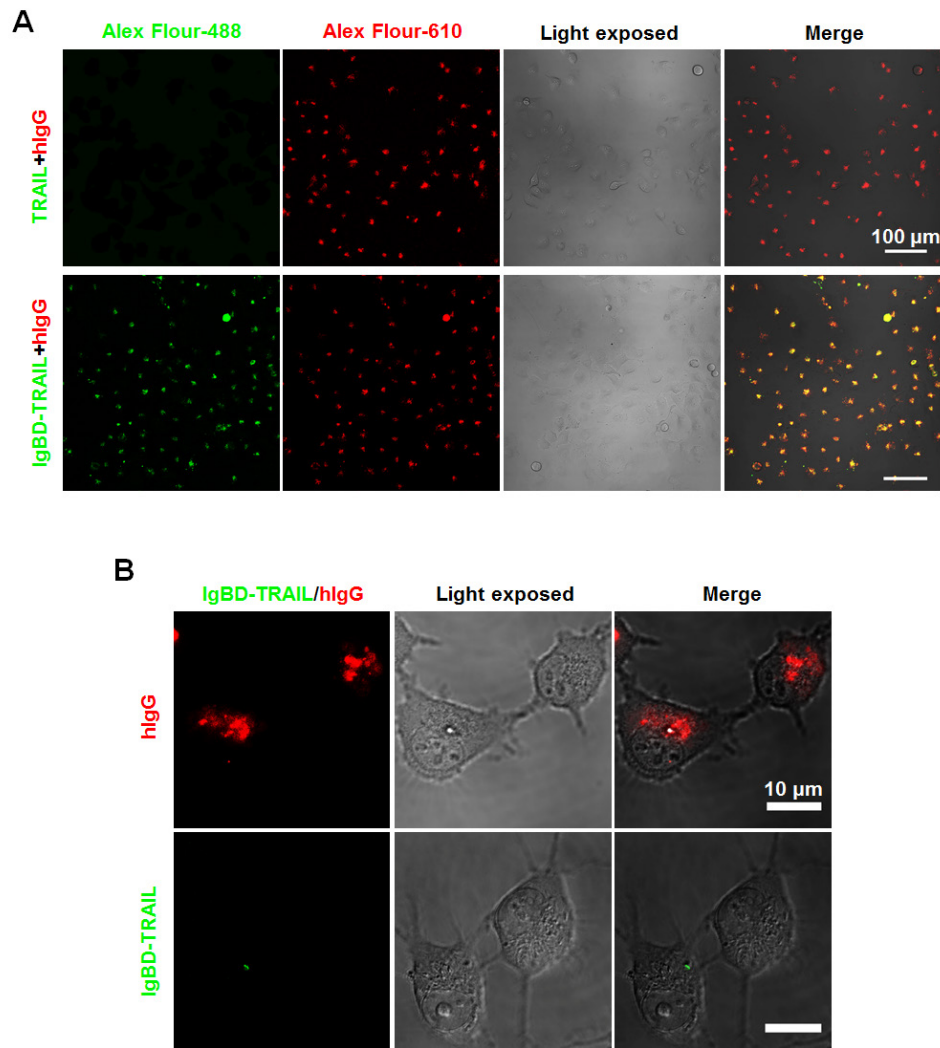

**Figure S3 (A)** Uptake and localization of TRAIL proteins preincubated with IgG in endothelial cells. **(B)** Cellular localization of IgBD-TRAIL and hIgG in endothelial cells.

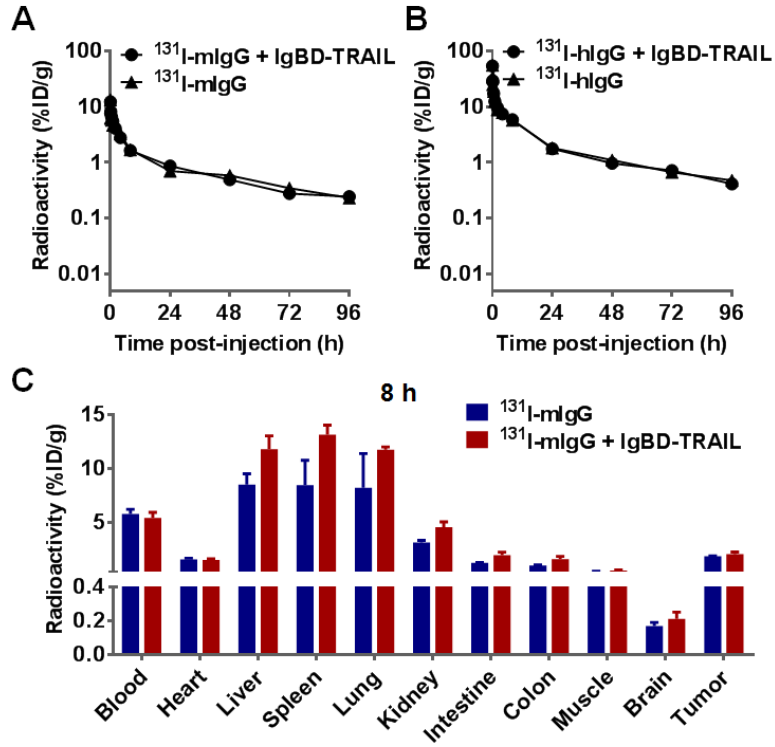

**Figure S4 Pharmacokinetic and biodistribution of IgG.** (A,B) Time-dependent clearance of  $^{131}\text{I}$ -labeled mIgG (A) or hIgG (B) preincubated with or without IgBD-TRAIL at molar ratio of 1:1. (C) Biodistribution of  $^{131}\text{I}$ -labeled mIgG in mice bearing COLO205 tumor grafts at 8 h post-injection.

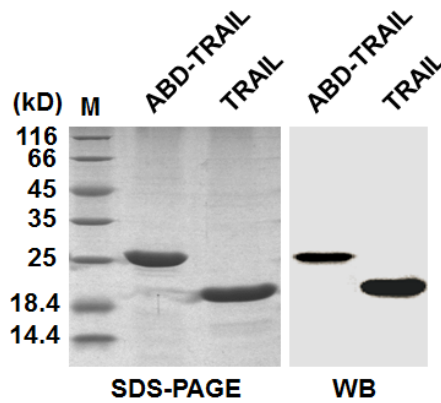

**Figure S5 SDS-PAGE and western blotting of purified ABD-TRAIL.**

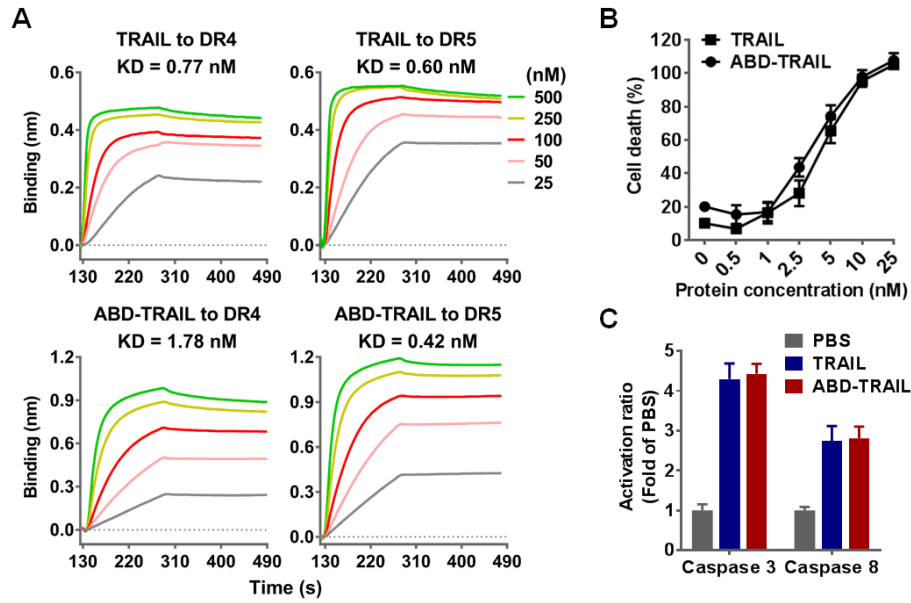

**Figure S6 Death receptor binding and cytotoxicity of ABD-TRAIL.** (A) Affinity of ABD-TRAIL and TRAIL for death receptor DR4 and DR5 measured by biolayer interferometry. (B) Cytotoxicity of ABD-TRAIL and TRAIL in COLO 205 tumor cells in absence of albumin. (C) Caspase activity of COLO 205 tumor cells treated with ABD-TRAIL and TRAIL in absence of albumin.

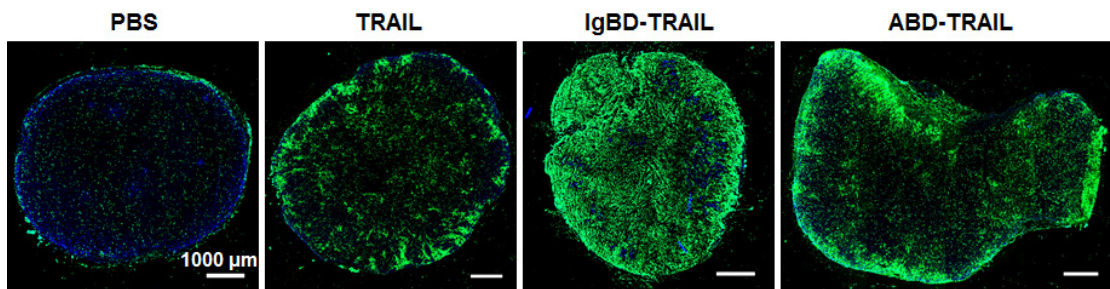

**Figure S7 Comparison on apoptosis induction illustrated by TUNEL.**

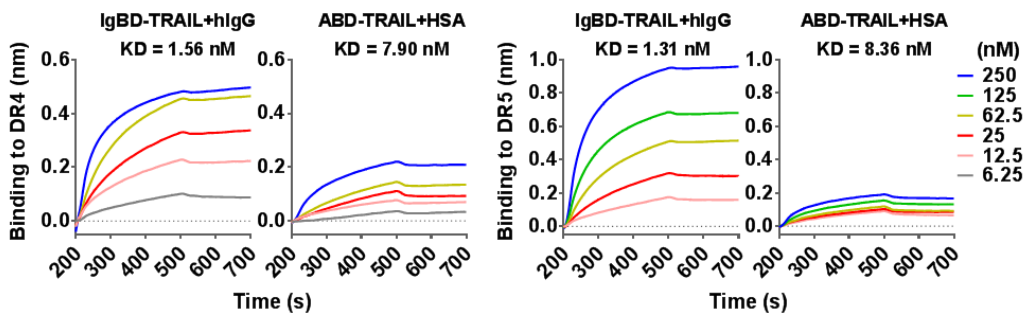

**Figure S8 Affinity of IgBD-TRAIL preincubated with hIgG and ABD-TRAIL preincubated with HSA for death receptor DR4-Fc and DR5-Fc.**

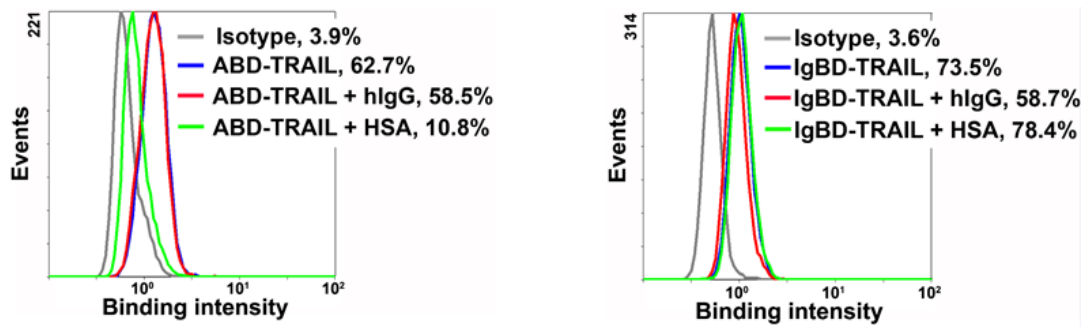

Figure S9 Cell binding of IgBD-TRAIL and ABD-TRAIL preincubated with or without hIgG or HSA. The positive rate was indicated.

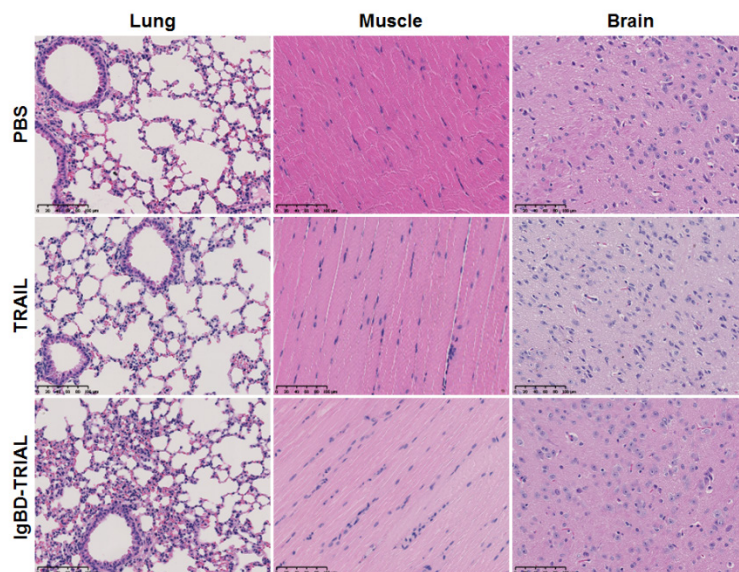

Figure S10 Histochemistry of tissues derived from mice for evaluation of short term acute toxicity of IgBD-TRAIL and TRAIL.

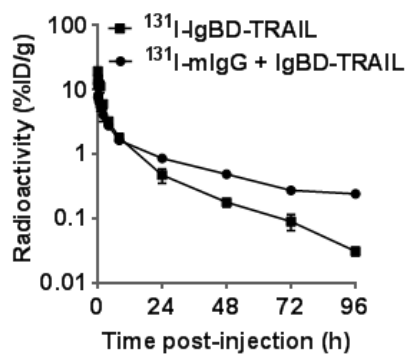

Figure S11 Blood clearance of <sup>131</sup>I-IgBD-TRAIL and <sup>131</sup>I-mIgG preincubated with IgBD-TRAIL.

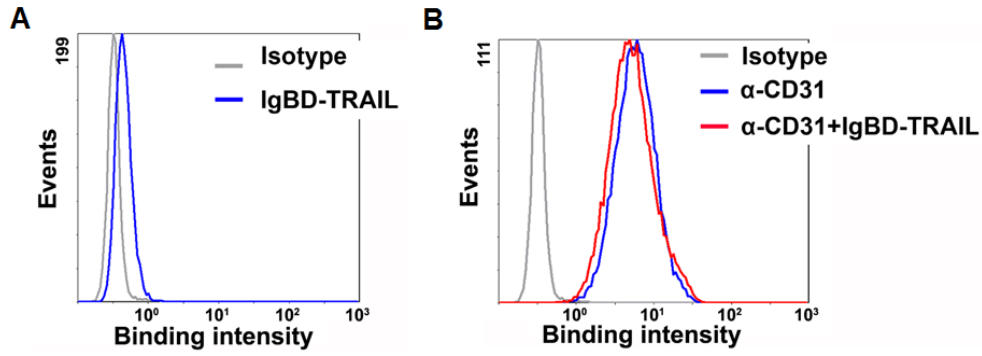

**Figure S12 Impact of bound IgBD-TRAIL on the antigen binding of antibody against CD31. (A)** Cell binding of IgBD-TRAIL preincubated without IgG. **(B)** Cell binding of antibody against CD31 preincubated with or without IgBD-TRAIL.

**Table S1: Distribution of <sup>131</sup>I-mIgG in mice, preincubated with or without IgBD-TRAIL**

| Organ/<br>Tissue | 1 h        |                     | 8 h       |                     | 24 h      |                     | 96 h      |                     |
|------------------|------------|---------------------|-----------|---------------------|-----------|---------------------|-----------|---------------------|
|                  | mIgG       | mIgG+<br>IgBD-TRAIL | mIgG      | mIgG+<br>IgBD-TRAIL | mIgG      | mIgG+<br>IgBD-TRAIL | mIgG      | mIgG+<br>IgBD-TRAIL |
| Blood            | 4.66±0.57  | 5.48±0.47           | 1.69±0.15 | 1.65±0.12           | 0.70±0.10 | 0.87±0.01           | 0.23±0.01 | 0.24±0.01           |
| Heart            | 1.96±0.27  | 2.00±0.17           | 0.73±0.07 | 0.65±0.01           | 0.25±0.03 | 0.29±0.01           | 0.16±0.01 | 0.05±0.00           |
| Liver            | 22.80±0.71 | 23.31±0.75          | 9.33±1.01 | 10.42±0.40          | 4.04±0.71 | 5.60±0.20           | 1.42±0.06 | 0.91±0.09           |
| Spleen           | 7.36±0.58  | 9.06±0.86           | 5.69±1.27 | 6.74±1.02           | 2.80±0.15 | 3.48±0.11           | 0.92±0.05 | 0.70±0.21           |
| Lung             | 34.17±3.78 | 31.36±0.64          | 3.30±0.42 | 3.64±0.41           | 0.74±0.04 | 1.20±0.16           | 0.26±0.00 | 0.14±0.02           |
| Kidney           | 8.09±0.82  | 9.97±0.17           | 3.59±0.14 | 3.87±0.16           | 1.65±0.21 | 2.21±0.33           | 0.69±0.02 | 0.60±0.04           |
| Colon            | 1.44±0.06  | 1.62±0.46           | 0.49±0.08 | 0.51±0.02           | 0.17±0.03 | 0.22±0.01           | 0.09±0.00 | 0.05±0.00           |
| Intestine        | 1.00±0.04  | 1.21±0.07           | 0.37±0.03 | 0.39±0.04           | 0.15±0.01 | 0.26±0.02           | 0.05±0.01 | 0.06±0.00           |
| Muscle           | 0.19±0.01  | 0.26±0.03           | 0.07±0.01 | 0.08±0.01           | 0.04±0.01 | 0.03±0.00           | 0.01±0.00 | 0.01±0.00           |
| Brain            | 0.54±0.03  | 0.60±0.04           | 0.19±0.00 | 0.17±0.00           | 0.08±0.00 | 0.10±0.01           | 0.03±0.00 | 0.02±0.00           |

Data are expressed as mean ± SEM percent of injected dose per gram tissue (%ID/g, n=3)

**Table S2: Distribution of <sup>131</sup>I-hIgG in mice, preincubated with or without IgBD-TRAIL**

| Organ/<br>Tissue | 1 h        |                     | 8 h       |                     | 24 h      |                     | 96 h      |                     |
|------------------|------------|---------------------|-----------|---------------------|-----------|---------------------|-----------|---------------------|
|                  | hIgG       | hIgG+<br>IgBD-TRAIL | hIgG      | hIgG+<br>IgBD-TRAIL | hIgG      | hIgG+<br>IgBD-TRAIL | hIgG      | hIgG+<br>IgBD-TRAIL |
| Blood            | 12.48±0.40 | 12.51±0.078         | 5.74±0.33 | 5.86±0.28           | 1.83±0.01 | 1.77±0.14           | 0.48±0.04 | 0.41±0.04           |
| Heart            | 3.10±0.01  | 2.80±0.11           | 1.69±0.10 | 1.65±0.08           | 0.49±0.02 | 0.49±0.02           | 0.18±0.01 | 0.17±0.01           |
| Liver            | 24.57±1.07 | 24.11±0.48          | 7.74±0.22 | 7.62±0.36           | 2.27±0.13 | 2.29±0.14           | 0.78±0.09 | 0.81±0.02           |
| Spleen           | 9.46±0.68  | 9.59±1.67           | 4.34±0.06 | 3.93±0.47           | 1.16±0.07 | 1.34±0.02           | 0.27±0.01 | 0.32±0.02           |
| Lung             | 19.34±0.22 | 16.48±0.70          | 6.42±0.91 | 4.19±0.34           | 1.38±0.15 | 1.14±0.14           | 0.26±0.00 | 0.24±0.01           |
| Kidney           | 5.82±0.12  | 5.80±0.62           | 3.32±0.03 | 3.52±0.21           | 0.79±0.03 | 0.84±0.06           | 0.27±0.01 | 0.28±0.02           |
| Colon            | 2.60±0.12  | 3.02±0.54           | 1.68±0.06 | 1.84±0.05           | 0.27±0.02 | 0.26±0.01           | 0.12±0.01 | 0.10±0.00           |
| Intestine        | 2.08±0.17  | 2.09±0.16           | 1.79±0.12 | 1.99±0.23           | 0.24±0.02 | 0.23±0.03           | 0.10±0.01 | 0.14±0.02           |
| Muscle           | 1.30±0.06  | 1.13±0.08           | 0.93±0.04 | 1.03±0.17           | 0.22±0.02 | 0.24±0.02           | 0.12±0.00 | 0.12±0.03           |
| Brain            | 0.51±0.02  | 0.48±0.04           | 0.29±0.01 | 0.36±0.05           | 0.06±0.01 | 0.07±0.01           | 0.03±0.00 | 0.03±0.00           |

Data are expressed as mean ± SEM percent of injected dose per gram tissue (%ID/g, n=3)
